# Supplementary material for: Formation of superoxide and ozone-like species on Cu doped CeO2(111) and their CO oxidation reactivity: a DFT study
Source: Royal Society of Chemistry journal article supplement (doi:10.1039/d3cp03885h), 2023-01-01
Supplement: d3cp03885h1.pdf [file d3cp03885h1.pdf]

**Table S1 Band gap, energy and Ce-O bond changes of CeO<sub>2</sub>(111) with and without U corrections**

| U-value (eV)         | 0         | 2.0       | 4.5       | 5.0       |
|----------------------|-----------|-----------|-----------|-----------|
| Band gap (eV)        | 1.56      | 1.59      | 1.42      | 1.47      |
| Band gap change (eV) | 0         | +0.03     | -0.12     | -0.09     |
| Energy (eV)          | -25573.36 | -25559.63 | -25544.27 | -25541.47 |
| Energy change (eV)   | 0         | +13.73    | +29.09    | +31.89    |
| Ce-O bond (Å)        | 2.34      | 2.34      | 2.35      | 2.35      |
| Ce-O bond change (Å) | 0         | 0         | +0.01     | +0.01     |

**Table S2 Bond lengths (Å) of undoped and Cu-doped CeO<sub>2</sub>(111) after the formation of oxygen vacancies**

|            | CeO <sub>2</sub> (111) with a V <sub>OS</sub> | CeO <sub>2</sub> (111) with a V <sub>OSS</sub> | Cu/CeO <sub>2</sub> (111) with a V <sub>OS</sub> | Cu/CeO <sub>2</sub> (111) with a V <sub>OSS</sub> |
|------------|-----------------------------------------------|------------------------------------------------|--------------------------------------------------|---------------------------------------------------|
| Ce3(Cu)-O1 | 2.26                                          | 2.25                                           | 2.03                                             | 1.99                                              |
| Cu-O2      | 2.26                                          | 2.25                                           | 2.03                                             | 1.99                                              |
| O1-Ce1     | 2.26                                          | 2.25                                           | 2.21                                             | 2.15                                              |
| O2-Ce2     | 2.26                                          | 2.25                                           | 2.21                                             | 2.15                                              |
| O3-Ce1     | 2.26                                          | 2.25                                           | 2.26                                             | 2.28                                              |
| O3-Ce2     | 2.26                                          | 2.25                                           | 2.26                                             | 2.28                                              |

**Table S3 Bond lengths (Å) of O<sub>2</sub> adsorbed on the V<sub>OS</sub>**

|                                  | Before optimization | After optimization |
|----------------------------------|---------------------|--------------------|
| O <sub>f1</sub> -O <sub>f2</sub> | 1.22                | 1.30               |
| O <sub>f2</sub> -Cu              | 2.99                | 1.90               |
| Cu-O1                            | 2.03                | 3.16               |
| Cu-O2                            | 2.03                | 3.17               |
| O <sub>f1</sub> -Ce1             | 1.52                | 2.78               |
| O <sub>f1</sub> -Ce2             | 2.75                | 2.78               |
| O <sub>f2</sub> -Ce1             | 2.62                | 3.70               |
| O <sub>f2</sub> -Ce2             | 2.74                | 3.80               |
| O <sub>f1</sub> -V <sub>OS</sub> | 0                   | 0.44               |

**Table S4 Bond lengths (Å) of O<sub>2</sub> adsorbed on the V<sub>OSS</sub>**

|                                   | Before optimization | After optimization |
|-----------------------------------|---------------------|--------------------|
| O <sub>f1</sub> -O <sub>f2</sub>  | 1.22                | 1.47               |
| O <sub>f2</sub> -O1               | 1.71                | 1.44               |
| O <sub>f1</sub> -Cu               | 2.13                | 2.36               |
| O <sub>f2</sub> -Cu               | 2.13                | 3.10               |
| Cu-O1                             | 1.99                | 3.54               |
| Cu-O2                             | 1.99                | 3.66               |
| O <sub>f1</sub> -V <sub>OSS</sub> | 0.02                | 0.76               |

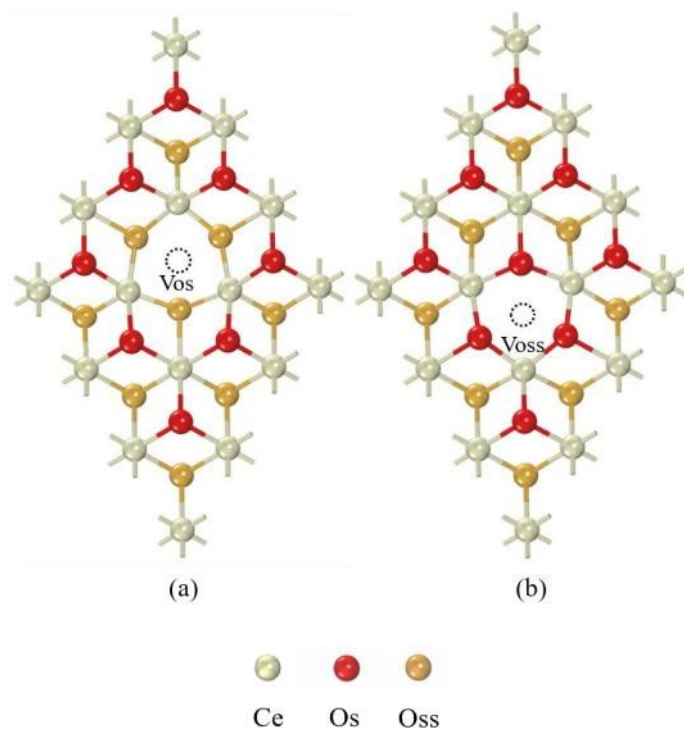

Figure S1 Top view: (a) CeO<sub>2</sub>(111) with a V<sub>OS</sub>; (b) CeO<sub>2</sub>(111) with a V<sub>OSS</sub>

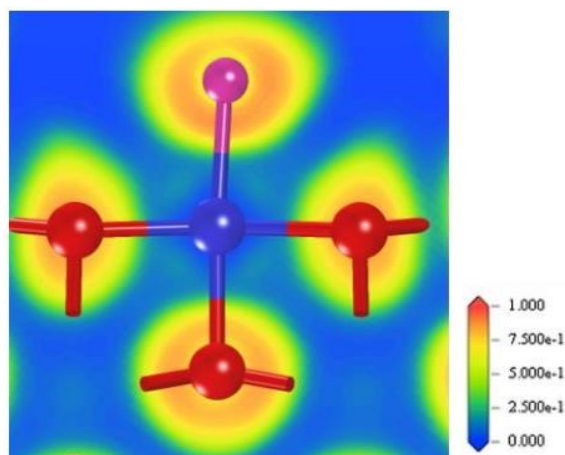

Figure S2 Electron localization diagram for the adsorption of O<sub>2</sub> on the V<sub>OS</sub> for Cu/CeO<sub>2</sub>(111)

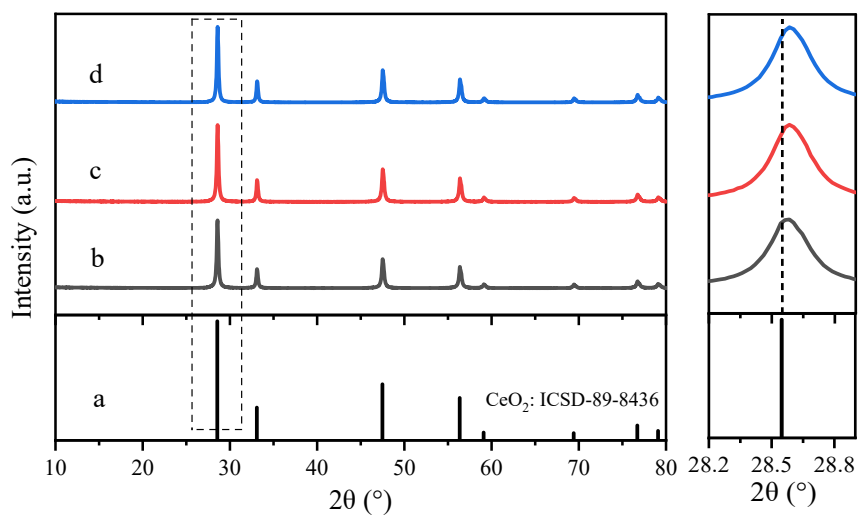

**Figure S3 XRD patterns of CeO<sub>2</sub> and CuO/CeO<sub>2</sub> catalysts calcined at different temperatures: (a) CeO<sub>2</sub>; (b) CuCe400; (c) CuCe500; (d) CuCe600 (CuO/CeO<sub>2</sub> catalysts calcined at 400 °C, 500 °C and 600 °C were named as CuCe400, CuCe500 and CuCe600, respectively.)**
